# Supplementary material
Source: PubMed Central journal article supplement (PMC4237229)
Supplement: NIHMS609583-supplement-S2.pdf [file NIHMS609583-supplement-S2.pdf]

Supplementary Table 1. Effects of morpholino oligonucleotides

| Type of embryo     | Gene tested      | Stage | Number of embryos |           |    | Figure       | Description                     |
|--------------------|------------------|-------|-------------------|-----------|----|--------------|---------------------------------|
|                    |                  |       | Down              | No effect | Up |              |                                 |
| <i>jam1a</i> MOatg | <i>runx1</i>     | 26hpf | 37                | 0         | 0  | Fig. 1g      |                                 |
| <i>jam1a</i> MOatg | <i>efnb2a</i>    | 26hpf | 0                 | 14        | 0  | Fig. 1j      |                                 |
| <i>jam1a</i> MOatg | <i>cmyb</i>      | 36hpf | 36                | 7         | 0  | Fig. 1l      |                                 |
| <i>jam1a</i> MOatg | <i>rag1</i>      | 4dpf  | 22                | 0         | 0  | Fig. 1m      |                                 |
| <i>jam1a</i> MOatg | <i>scl-a/β</i>   | 30hpf | 16                | 0         | 0  | Fig. 1n      | Full-length <i>scl</i> probe    |
| <i>jam1a</i> MOatg | <i>scl-a</i>     | 30hpf | 0                 | 17        | 0  | Fig. 1o      | 5' <i>scl</i> probe             |
| <i>jam1a</i> MOatg | <i>fli1</i>      | 12hpf | 0                 | 20        | 0  | Fig. 2b      |                                 |
| <i>jam1a</i> MOatg | <i>fli1</i>      | 17hpf | 27*               | 3         | 0  | Fig. 2e      |                                 |
| <i>jam1a</i> MOatg | <i>dlc</i>       | 14hpf | 0                 | 20        | 0  | Fig. 4o      |                                 |
| <i>jam1a</i> MOatg | <i>dld</i>       | 14hpf | 0                 | 24        | 0  | Fig. 4q      |                                 |
| <i>jam1a</i> MOatg | <i>runx1</i>     | 28hpf | 24                | 3         | 0  | Fig. 4s      | <i>jam1a</i> MOatg only         |
| <i>jam1a</i> MOatg | <i>runx1</i>     | 28hpf | 4                 | 20**      | 0  | Fig. 4t      | <i>jam1a</i> MOatg + <i>dlc</i> |
| <i>jam1a</i> MOatg | <i>runx1</i>     | 28hpf | 5                 | 26***     | 0  | Fig. 4u      | <i>jam1a</i> MOatg + <i>dld</i> |
| <i>jam1a</i> MOatg | <i>gata1</i>     | 24hpf | 0                 | 18        | 0  | E.D. Fig. 4d |                                 |
| <i>jam1a</i> MOatg | <i>l-plastin</i> | 24hpf | 0                 | 13        | 0  | E.D. Fig. 4e |                                 |
| <i>jam1a</i> MOatg | <i>l-plastin</i> | 4dpf  | 33                | 2         | 0  | E.D. Fig. 4f | Expression in the CHT           |
| <i>jam1a</i> MOatg | <i>kdrl</i>      | 26hpf | 0                 | 20        | 0  | E.D. Fig. 4g | Expression in the trunk         |
| <i>jam1a</i> MOatg | <i>kdrl</i>      | 26hpf | 20                | 0         | 0  | E.D. Fig. 4h | Expression in the CHT           |
| <i>jam1a</i> MOatg | <i>tbx20</i>     | 26hpf | 0                 | 13        | 0  | E.D. Fig. 4i |                                 |
| <i>jam1a</i> MOatg | <i>flt4</i>      | 26hpf | 0                 | 14        | 0  | E.D. Fig. 4j |                                 |
| <i>jam1a</i> MOatg | <i>cdh17</i>     | 24hpf | 0                 | 24        | 0  | E.D. Fig. 4k |                                 |
| <i>jam1a</i> MOatg | <i>desma</i>     | 26hpf | 0                 | 21        | 0  | E.D. Fig. 4l |                                 |
| <i>jam1a</i> MOatg | <i>nkx3.1</i>    | 26hpf | 0                 | 24        | 0  | E.D. Fig. 4m |                                 |
| <i>jam1a</i> MOatg | <i>shha</i>      | 16hpf | 0                 | 17        | 0  | E.D. Fig. 4n |                                 |
| <i>jam1a</i> MOatg | <i>shha</i>      | 26hpf | 0                 | 17        | 0  | E.D. Fig. 4o |                                 |
| <i>jam1a</i> MOatg | <i>vegfa</i>     | 17hpf | 0                 | 23        | 0  | E.D. Fig. 4p |                                 |
| <i>jam1a</i> MOatg | <i>vegfa</i>     | 26hpf | 0                 | 17        | 0  | E.D. Fig. 4q |                                 |
| <i>jam1a</i> MOatg | <i>runx1</i>     | 26hpf | 47                | 4         | 0  | E.D. Fig. 7b | <i>hsp:Gal4/UAS:NICD</i> (-)    |
| <i>jam1a</i> MOatg | <i>runx1</i>     | 26hpf | 1                 | 4         | 15 | E.D. Fig. 7b | <i>hsp:Gal4/UAS:NICD</i> (+)    |
| <i>jam1a</i> MOatg | <i>runx1</i>     | 26hpf | 59                | 1         | 0  | E.D. Fig. 7d | <i>fli1:Gal4/UAS:NICD</i> (-)   |
| <i>jam1a</i> MOatg | <i>runx1</i>     | 26hpf | 0                 | 0         | 22 | E.D. Fig. 7d | <i>fli1:Gal4/UAS:NICD</i> (+)   |
| <i>jam1a</i> MOatg | <i>notch1b</i>   | 26hpf | 0                 | 15        | 0  | E.D. Fig. 9b |                                 |
| <i>jam1a</i> MOatg | <i>notch3</i>    | 26hpf | 0                 | 17        | 0  | E.D. Fig. 9d |                                 |
| <i>jam1a</i> MOatg | <i>dlc</i>       | 26hpf | 0                 | 12        | 0  | E.D. Fig. 9f |                                 |
| <i>jam1a</i> MOatg | <i>dll4</i>      | 26hpf | 0                 | 17        | 0  | E.D. Fig. 9h |                                 |
| <i>jam1a</i> MOatg | <i>Tp1:GFP</i>   | 28hpf | 7                 | 1         | 0  | E.D. Fig. 9j | <i>jam1a</i> MOatg only         |
| <i>jam1a</i> MOatg | <i>Tp1:GFP</i>   | 28hpf | 3                 | 5         | 0  | E.D. Fig. 9k | <i>jam1a</i> MOatg + <i>dlc</i> |
| <i>jam1a</i> MOatg | <i>Tp1:GFP</i>   | 28hpf | 2                 | 6         | 0  | E.D. Fig. 9l | <i>jam1a</i> MOatg + <i>dld</i> |
| <i>jam1a</i> MOex7 | <i>runx1</i>     | 26hpf | 24                | 5         | 0  | Fig. 1h      |                                 |
| <i>jam1a</i> MOex7 | <i>efnb2a</i>    | 26hpf | 0                 | 13        | 0  | Fig. 1k      |                                 |
| <i>jam1a</i> MOex7 | <i>fli1</i>      | 12hpf | 0                 | 20        | 0  | Fig. 2c      |                                 |
| <i>jam1a</i> MOex7 | <i>fli1</i>      | 17hpf | 27*               | 4         | 0  | Fig. 2f      |                                 |

|                    |               |       |     |    |    |              |                               |
|--------------------|---------------|-------|-----|----|----|--------------|-------------------------------|
| <i>jam1a</i> MOex7 | <i>cmyb</i>   | 36hpf | 13  | 3  | 0  | E.D. Fig. 3g |                               |
| <i>jam1a</i> MOex7 | <i>rag1</i>   | 4dpf  | 25  | 0  | 0  | E.D. Fig. 3i |                               |
| <i>jam2a</i> MOatg | <i>runx1</i>  | 26hpf | 33  | 2  | 0  | Fig. 3h      |                               |
| <i>jam2a</i> MOatg | <i>efnb2a</i> | 26hpf | 1   | 29 | 0  | Fig. 3j      |                               |
| <i>jam2a</i> MOatg | <i>fli1</i>   | 17hpf | 26* | 1  | 0  | Fig. 3k      |                               |
| <i>jam2a</i> MOatg | <i>runx1</i>  | 26hpf | 41  | 0  | 0  | E.D. Fig. 7e | <i>hsp:Gal4/UAS:NICD</i> (-)  |
| <i>jam2a</i> MOatg | <i>runx1</i>  | 26hpf | 1   | 14 | 0  | E.D. Fig. 7e | <i>hsp:Gal4/UAS:NICD</i> (+)  |
| <i>jam2a</i> MOatg | <i>runx1</i>  | 26hpf | 35  | 12 | 0  | E.D. Fig. 7f | <i>fli1:Gal4/UAS:NICD</i> (-) |
| <i>jam2a</i> MOatg | <i>runx1</i>  | 26hpf | 0   | 0  | 14 | E.D. Fig. 7f | <i>fli1:Gal4/UAS:NICD</i> (+) |
| <i>jam2a</i> MOex5 | <i>runx1</i>  | 26hpf | 23  | 3  | 0  | E.D. Fig. 5f |                               |
| <i>jam2a</i> MOex5 | <i>efnb2a</i> | 26hpf | 0   | 24 | 0  | E.D. Fig. 5h |                               |
| <i>jam2a</i> MOex5 | <i>cmyb</i>   | 36hpf | 17  | 4  | 0  | E.D. Fig. 5j |                               |
| <i>jam2a</i> MOex5 | <i>rag1</i>   | 4dpf  | 17  | 0  | 0  | E.D. Fig. 5l |                               |

'Down' and 'Up' denote downregulation and upregulation of each gene, respectively. \*The migration of *fli1*<sup>+</sup> cells is delayed. \*\*The expression of *runx1* is partially restored. \*\*\*The expression of *runx1* is almost fully restored. E.D. Fig., Extended Data Figure.

Supplementary Table 2. Primer sequences for cDNA cloning, RT-PCR, and qPCR

| Gene symbol         | GenBank Accession # | Primers for cDNA cloning |                        |
|---------------------|---------------------|--------------------------|------------------------|
|                     |                     | Forward                  | Reverse                |
| <i>jam1a (f11r)</i> | NM_001004667        | TCGTCACAGGCATACATGGT     | GAATCCGTTAGCCTCATCCA   |
| <i>jam2a</i>        | NM_001098264        | AGTGGAGGTGCACGAGTTCT     | CAGAACCACAGCTGAGACCA   |
| <i>dll4</i>         | NM_001079835        | GCATTTTTCACGACCGTTTT     | ATGATCCGTGCAAAGACCTC   |
| <i>scl-5'</i>       | NM_213237           | AAACCTCAGACATGGATGACC    | CTTGAGCTCCCTGCCTTTTA   |
| <i>cdh17</i>        | NM_194422           | ATGAAAGCTGAAGCCAAGGA     | AATGACGCCGAATACTCCTG   |
| Primers for RT-PCR  |                     |                          |                        |
|                     |                     | Forward                  | Reverse                |
| <i>jam1a (f11r)</i> | NM_001004667        | GGTGTCTGGAAGTGGTGGAT     | AAAAGCCAATATGCAAAATGAA |
| <i>jam2a</i>        | NM_001098264        | GATCGCGCAGATATTGAAGG     | TCGGCTGAAATATCCCTGTC   |
| <i>ef1a</i>         | NM_131263           | CAAGGAAGTCAGCGCATACA     | TGATGACCTGAGCGTTGAAG   |
| Primer for qPCR     |                     |                          |                        |
|                     |                     | Forward                  | Reverse                |
| <i>jam1a (f11r)</i> | NM_001004667        | ATTTGGAGTTCCCGAGTGTG     | TGGCAGATATCCCTTTTTCG   |
| <i>jam2a</i>        | NM_001098264        | GCATCGAGTGGAAGAGGAAA     | GGTTTCTCCAGTGAGATGG    |
| <i>ef1a</i>         | NM_131263           | ACCGGCCATCTGATCTACAA     | CAATGGTGATACCACGCTCA   |
| <i>notch1a</i>      | NM_131441           | AGCATGATGTGAACGAGTGC     | CCGTTCTTACAGGGAGACGA   |
| <i>notch1b</i>      | NM_131302           | AAACGACGCCACCTGTTTAG     | GCACTCGCATTGGTAGTTGTT  |
| <i>notch3</i>       | NM_131549           | TGTGACCTAGACCGAAACGA     | CACACAGGTGCCCTGATTTA   |
| <i>runx1</i>        | NM_131603           | CAAGTGCCACATATCAGAG      | CTGCTCAGAGAAAGCTAACG   |
