# Supplementary material
Source: PubMed Central journal article supplement (PMC4237229)
Supplement: NIHMS609583-supplement-S3.pdf [file NIHMS609583-supplement-S3.pdf]

## **Supplementary legends**

### **Supplementary Video 1. PLM cell migration in uninjected wild type embryo.**

A time-lapse imaging of uninjected *fli1:GFP; phldb1:Gal4-mCherry* double transgenic embryo. The video was captured from 14hpf onwards. The embryo is shown in a dorsal view, with head to the left. Elapsed time is shown at the top right.

### **Supplementary Video 2. PLM cell migration in *jam1a* MOatg-injected embryo.**

A time-lapse imaging of *fli1:GFP; phldb1:Gal4-mCherry* double transgenic embryo injected with *jam1a* MOatg. The video was captured from 14hpf onwards. The embryo is shown in a dorsal view, with head to the left. Elapsed time is shown at the top right.

### **Supplementary Video 3. PLM cell migration in *jam1a* MOex7-injected embryo.**

A time-lapse imaging of *fli1:GFP; phldb1:Gal4-mCherry* double transgenic embryo injected with *jam1a* MOex7. The video was captured from 14hpf onwards. The embryo is shown in a dorsal view, with head to the left. Elapsed time is shown at the top right.

### **Supplementary Video 4. PLM cell migration in *jam2a* MO-injected embryo.**

A time-lapse imaging of *fli1:GFP; phldb1:Gal4-mCherry* double transgenic embryo injected with *jam2a* MO. The video was captured from 14hpf onwards. The embryo is shown in a dorsal view, with head to the left. Elapsed time is shown at the top right. It should be noted that *jam2a* morphants show torsion in the development of the left-right body axis.

### **Supplementary Video 5. PLM cell migration in *jam2a* MOex5-injected embryo.**

A time-lapse imaging of *fli1:GFP; phldb1:Gal4-mCherry* double transgenic embryo injected with *jam2a* MOex5. The video was captured from 14hpf onwards. The embryo is shown in a dorsal view, with head to the left. Elapsed time is shown at the top right.

**Supplementary Table 1. Effects of morpholino oligonucleotides.**

**Supplementary Table 2. Primer sequences for cDNA cloning, RT-PCR, and qPCR**
